# Supplementary material
Source: PubMed Central journal article supplement (PMC3883901)
Supplement: NIHMS525887-supplement-01.pdf [file NIHMS525887-supplement-01.pdf]

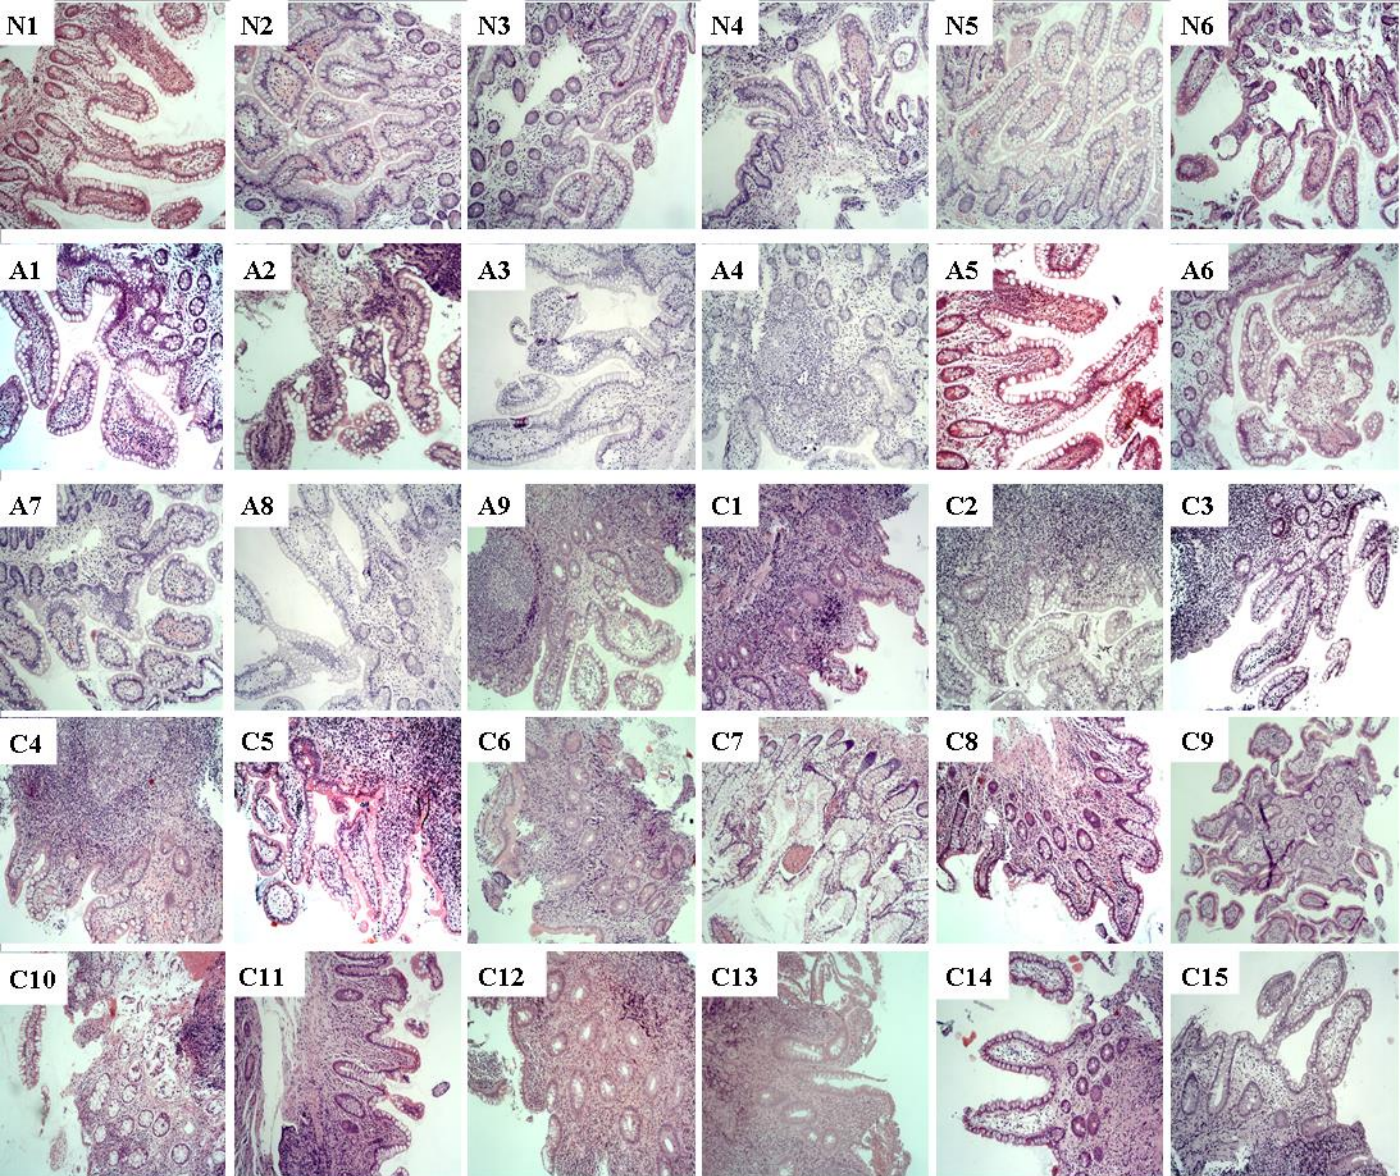

**Supplemental Figure 1: Microphotographs showing representative hematoxylin and eosin (H&E)-stained ileal sections of AS patients.** N1-N6: patients with normal histology; A1-A9: patients with acute inflammation; C1-C15: patients with chronic inflammation. Original magnification x 100



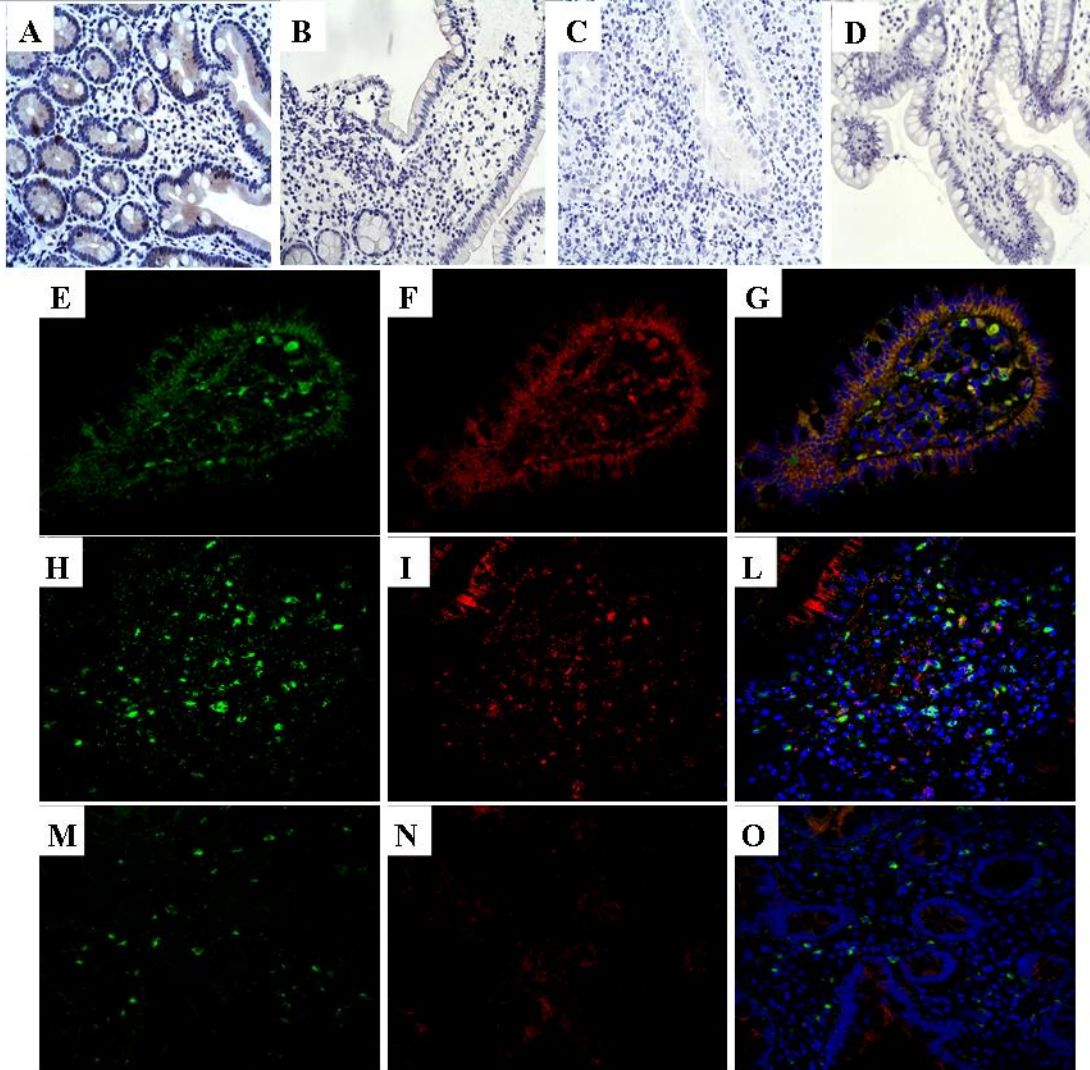

**Supplemental Figure 2.** SQSTM1 immunoreactivity in ileal biopsies of healthy controls (A), AS (B) and CD (C) patients; A-C: original magnification x250. D: normal ileal biopsy treated with isotype control antibody. E-O: Representative image of ATG5/LC3 immunostainings in the gut of AS patients with chronic gut inflammation: single staining for ATG5 (E) and LC3II (F); merged double staining for ATG5 (green) and LC3II (red) (G). H-L: representative image of ATG5/LC3 immunostainings in the gut of CD patients: single staining for ATG5 (H) and LC3II (I); merged double staining for ATG5 (green) and LC3II (red) (L). M-O: representative image of ATG5/LC3 immunostainings in the gut of healthy controls: single staining for ATG5 (M) and LC3II (N); merged double staining for ATG5 (green) and LC3II (red) (O).

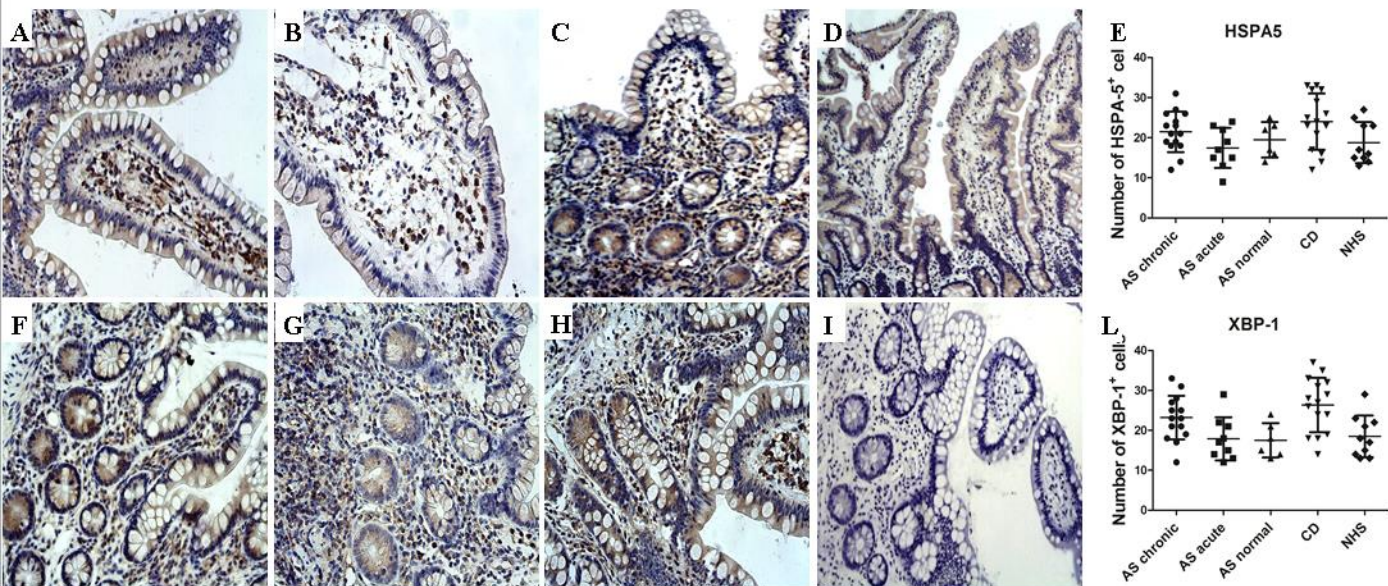

**Supplemental Figure 3. HSPA5 and XBP-1 are not differentially regulated in the gut of AS patients and healthy subjects.** **A-H:** Immunohistochemical analysis of HSPA-5 (**A-D**) and XBP-1 (**F-I**) expression in ileal samples from patients and controls. Five- $\mu\text{m}$ -thick paraffin embedded sections of ileal biopsies obtained from patients and controls were stained with anti-HSPA5 (**A-C**) and XBP-1 (**F-H**) antibodies. Abundant HSPA5 and XBP-1-positive cells were observed in both NCs (**A** and **F**, respectively), in AS patients (**B** and **G**, respectively) and in CD (**C** and **H**, respectively). XBP-1 positive stained cells were observed among infiltrating mononuclear cells and in some epithelial cells located in the bottom of the crypts highly resembling Paneth cells. **D** and **I:** normal ileal biopsies treated with isotype control antibodies (**A-D** and **F-I**, original magnification  $\times 250$ ). **E, L:** quantification of HSPA-5 (**E**) and XBP-1 (**L**) positive cells in the ileal mucosa from patients and controls.
